1 **Title:** Role of the Matrix-Capsid Cleavage Site Polymorphism S124V of HIV-1 Sub-subtype A2 in  
2 Gag Polyprotein Processing

3

4 **Authors names:**

5 Carla Mavian<sup>1\*</sup>, Roxana M Coman<sup>1,2\*</sup>, Ben M Dunn<sup>2</sup>, Maureen M Goodenow<sup>3#</sup>.

6

7 \*= CM and RMC contributed equally to this article.

8 #= Corresponding author.

9

10 **Author affiliations:**

11 <sup>1</sup>Department of Pathology, Immunology and Laboratory Medicine, College of Medicine, University  
12 of Florida, Gainesville, Florida, USA; <sup>2</sup>Department of Biochemistry and Molecular Biology, College  
13 of Medicine, University of Florida, Gainesville, Florida, USA; <sup>3</sup>Office of AIDS Research, National  
14 Institutes of Health, Bethesda, Maryland, USA.

15

16 **Corresponding author:**

17 Maureen M. Goodenow, e-mail: [goodenow@ufl.edu](mailto:goodenow@ufl.edu), [maureen.goodenow@nih.gov](mailto:maureen.goodenow@nih.gov)

18

19 **Funding**

20 This study was supported in part by NIH R01 AI28571; Stephany W. Holloway University Chair  
21 for HIV/AIDS Research (M.M.G.); and Laura McClamma Fellowship (C.M. and R.M.C.). All  
22 authors declare no conflict of interest.

23

24 **Transparency declarations:**

25 None to declare.

26 **Graphical Abstract**  
27

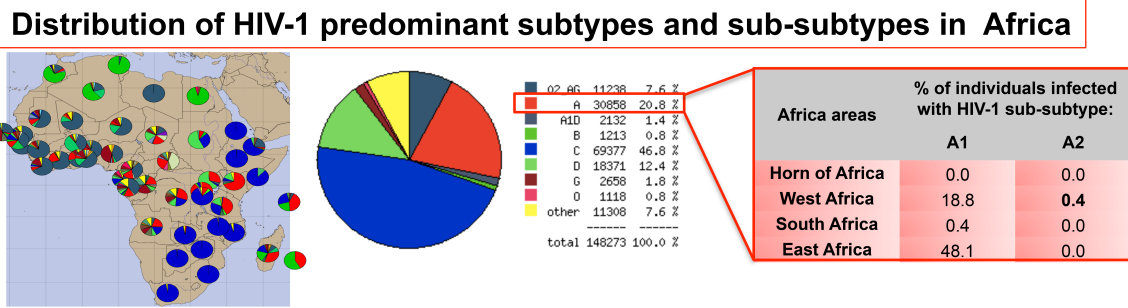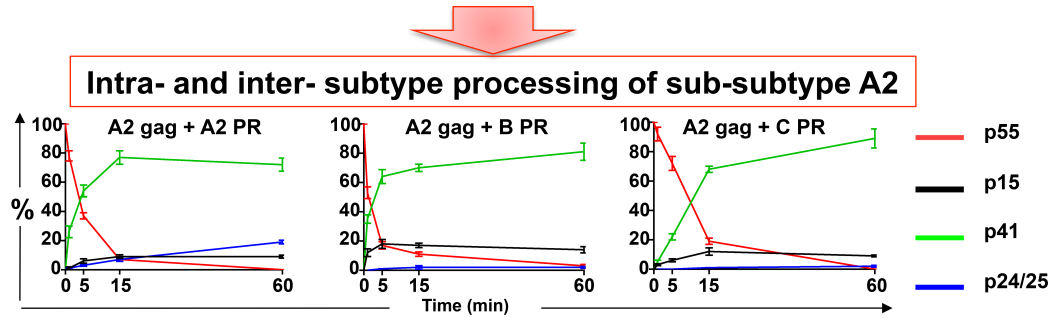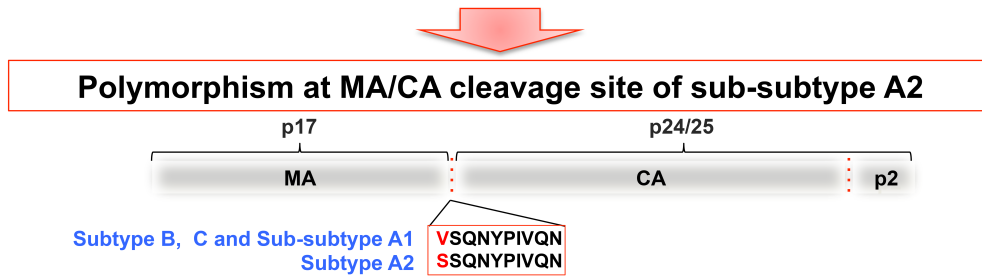

28  
29

30 **Abstract (149/150 words max)**

31 Subtype C and A HIV-1 strains dominate the epidemic in Africa and Asia, while sub-subtype A2  
32 is found at low frequency only in West Africa. To relate Gag processing *in vitro* with viral fitness,  
33 viral protease (PR) enzymatic activity and *in vitro* Gag processing were evaluated. The rate of  
34 sub-subtype A2 Gag polyprotein processing, as production of the p24 protein, was reduced  
35 compared to subtype B or C independent of PR subtype, indicating that subtype A2 Gag  
36 qualitatively differed from other subtypes. Introduction of subtype B matrix-capsid cleavage site  
37 in sub-subtype A2 Gag only partially restored the processing rate. Unique amino acid  
38 polymorphism V124S at the matrix-capsid cleavage site, together with other polymorphisms at  
39 non-cleavage sites, are differentially influencing the processing of Gag polyproteins. This genetic  
40 polymorphisms landscape defining HIV-1 sub-subtypes, subtypes and recombinant forms are  
41 determinants of viral fitness and frequency in the HIV-1 infected population.

42

43 **Keywords:** HIV-1, gag polyprotein, gag processing, rate, sub-subtype A2, matrix capsid cleavage  
44 site, intra-subtype, inter-subtype

45

46 **Highlights: (3 to 5 highlights)**

- 47 1. The polymorphism at matrix-capsid cleavage site, together with non-cleavage sites  
48 polymorphisms, direct the processing rate of the substrate, not the intrinsic activity of the  
49 enzyme.
- 50 2. The less prevalent and less infectious sub-subtype A2 harbors the matrix-capsid cleavage site  
51 polymorphism that we report as a limiting factor for gag processing.
- 52 3. Sub-subtype A2 Gag polyprotein processing rate is independent of the PR subtype.

53

54

## 55 Introduction

56 High genetic variability and extensive heterogeneity are the major characteristic of HIV-1.  
57 It has been recently proposed that the recombinant viruses seeded the early global HIV epidemic  
58 in central Africa since the early 1980s [1]. Multiple HIV-1 subtypes co-circulate within regions  
59 sharing human interchange/migration, leading to frequent inter-subtype recombination and  
60 appearance of circulating recombinant forms (CRFs) (<http://www.hiv.lanl.gov> 2017) [2, 3]. During  
61 the last 30 years, 20% of HIV-1 genotypes have undergone inter-subtype recombination and  
62 CRFs such as CRF01\_AE, CRF\_02AG and CRF\_07BC contribute to almost 10% of total HIV-1  
63 infections worldwide (<http://www.hiv.lanl.gov> 2017) [2, 4-6]. While global HIV epidemic is  
64 characterized by compartmentalized local epidemics dominated by a single subtype indicating  
65 strong founder effects, in Africa high diversity of subtypes and CRFs are dominating the epidemic  
66 [7-9]. There is no single factor that accounts for geographic prevalence of HIV subtypes observed  
67 in countries in Africa; whether high prevalence of certain HIV subtypes reflects increased fitness,  
68 or confounding factors, such as sexual transmission networks, ethnicity, socio-economic status  
69 or environmental limitations, remains unclear [10, 11]. Mapping recombination sites in the genome  
70 of recombinant viruses provides insights into functional regions of the virus genome. For example,  
71 recombination between the envelope [*env*] and *gag/pol* regions of viral genomes may increase  
72 fitness as 25 to 29% of HIV-1 infected individuals in Africa carry CRF with discordant *gag* and *env*  
73 subtypes, predominantly subtypes A and G [4, 5]. In contrast, recombination within *gag* and *pol*  
74 regions between subtypes may have a fitness cost to the virus, as the *gag-pol* region coevolves  
75 as a functional unit reflecting the interplay between the enzymatic activity of PR in *pol* and the  
76 cleavage-site substrates distributed across the Gag polyprotein [12, 13].

77 The evolution of HIV-1 subtype A, similarly to subtype F, gave rise to five different distinct  
78 lineages, defined as sub-subtypes [A1, A2, A3, A4, A5] [14-17]. These sub-subtypes are highly  
79 related to the parental subtype A clade, and form sub-clades with a distinct sister clade to subtype  
80 A in phylogenetic trees from *gag*, *pol*, *env*, and *nef* regions with genetic distance of about half of

81 that between subtypes [14]. Sub-subtype A2, the second most prevalent sub-subtype of the A  
82 clade, was originally described in Kenya and sporadically reported in other parts of the world [14,  
83 18-20]. In contrast to sub-subtype A1, prototypic for the subtype A epidemic worldwide according  
84 to the new nomenclature, sub-subtype A2 is found to infect 0.4% of African population only in  
85 West Africa [14, 21].

86 The extensive HIV-1 subtype diversity found in Africa, epicenter of the pandemic, offers  
87 the best frame to relate genetics of subtypes to socio-behavioral factors influencing viral fitness  
88 [2, 3]. Infections by non-B subtypes of HIV-1, such as subtypes C and A, predominate in specific  
89 regions in Africa [2]. However, because subtype B dominated western hemisphere countries HIV-  
90 1 infections, antiretroviral drug development and susceptibility testing were originally targeted to  
91 subtype B, and consequently molecular studies on non-B subtypes Gag polyproteins and PR  
92 processing are lacking [22-27]. Viral fitness research aimed to identify polymorphisms that play a  
93 key role in antiretroviral mechanisms, have focused mainly on replicative fitness within hosts or  
94 in cultured cells [28]. Assessing viral fitness is complex to dissect at the whole virus level, as  
95 compensation across the genome can provide an “apparently” fit virus, even though certain  
96 functional aspects of the virus may be suboptimal. We and others have shown that natural genetic  
97 polymorphisms present at Gag cleavage sites can modulate Gag processing and relate to fitness  
98 in different ecosystems [i.e., drug resistant or drug sensitive virus in the absence or presence of  
99 PI] [13, 22, 25, 29, 30]. The idea underlying our approach is the characterization of the role of  
100 Gag polymorphisms *ex vivo*, which we expect to be correlated with fitness, as *ex vivo* provides  
101 insights into potential functional differences that may be obscured by replication competent *in vitro*  
102 assays.

103 Our study investigates the role of polymorphisms found at the cleavage site of sub-subtype  
104 A2, B and C Gag polyproteins, during *ex vivo* processing by the viral protease, rather than to viral  
105 replicative analysis *in vivo*, and relates the Gag processing events *ex vivo* with viral fitness in  
106 human populations and geographic prevalence [22, 25].

107 **Materials and methods**

108 **Mutagenesis and expression of HIV-1 PR and *gag-pol* genes.**

109 HIV-1 subtype B PR allele was obtained from a molecular clone of HIV-1<sub>AD</sub> [13, 31],  
110 while sub-subtype A2 (NIH clone p92UG037.1, accession number AF286237) and subtype C  
111 alleles (NIH clone p94IN476.104, accession number AF286223) were obtained through the AIDS  
112 Research and Reference Reagent program, Division of AIDS, NIAID, from Drs. Rodenburg, Gao,  
113 and Hahn [14, 32]. HIV-1 PR cloning into the pET23a expression vector (Novagen), expression  
114 in *Escherichia coli* strain BL21 Star DE3 PlyS (Invitrogen), and purification from inclusion  
115 bodies were performed as previously described [33, 34].

116 The *gag-pol* genes from subtypes B, C, or A2 were amplified using primers engineered to  
117 introduce restriction sites XhoI at the 5' end and MluI at the 3' end of the amplicon for directional  
118 cloning into the TNT expression vector. Sequence alignment of PR and Gag of sub-subtype A2,  
119 subtypes B or C, and of subtype A1 (Genbank accession number: AB098332), was performed  
120 with Clustalw2 (<http://www.ebi.ac.uk/Tools/msa/clustalw2/>) (Figure S1).

121 The subtype B matrix/capsid (MA/CA) cleavage site was introduced into sub-subtype A2  
122 p55 *gag-pol* gene either by changing residue 124 from valine (V) to serine (S) (A2gagS124V) or  
123 introducing the glutamine-valine (QV) dipeptide at position 124 (A2gagQV). Mimicking the sub-  
124 subtype A2 MA/CA cleavage site in the subtype B Gag polyprotein was performed by mutating  
125 the valine in position 128 to either leucine (L) (BgagV184L) or S (BgagV128S), or by deletion of  
126 the glutamine and valine residues in positions 127 and 128 (Bgag\_ΔQV). Mutations were  
127 confirmed by Sanger sequencing at the Interdisciplinary Center for Biotechnology Research of  
128 the University of Florida.

129 **PR activity constants.**

130 The Michaelis-Menten constants  $k_{cat}$ ,  $K_m$ , and  $k_{cat}/K_m$  values were determined *in vitro* for  
131 each PR subtype variant using the chromogenic substrates K-A-R-V-nL\*Nph-E-A-nL-G, which

132 resembles the CA/p2 cleavage site of subtype B [35], as previously described [33]. Cleavage of  
133 the substrate was monitored using a Cary 50 Bio Varian spectrophotometer equipped with an 18-  
134 cell multi transport system.

135 **PR processing in trans of Gag polyproteins transcribed and translated *in vitro*.**

136 TNT plasmids containing a *gag* open reading reproducing exactly the encoded Gag  
137 polyproteins of subtypes B and C, and sub-subtype A2 were mixed with TNT T7 Quick Master  
138 Mix (rabbit reticulocyte lysate and a mixture of all the amino acids except methionine), [<sup>35</sup>S] Met  
139 (1000 Ci/mmol at 10 mCi/ml) and nuclease-free H<sub>2</sub>O. After incubation at 30°C for 2 h, active HIV-  
140 1 PR at concentrations ranging from 10 nM to 50 nM was added to the reaction mixture. Aliquots  
141 were collected immediately before [time 0] and at 1, 5, 15, 60 and after adding enzyme, quenched  
142 with 2x Laemmli buffer at 1:1 ratio and heated to 70°C for 2 min. An extra aliquot was sampled at  
143 90 min for recombinant Gag proteins. Samples were electrophoresed through a 10-20% SDS-  
144 PAGE gel (BioRad) that was subsequently fixed for 30 min in a solution containing 10% acetic  
145 acid and 5% hydrochloric acid and then soaked for 5 min in 10% glycerol solution. Gels were  
146 dried and exposed to either a XAR-5 film (Kodak) or a phospho-screen at room temperature. The  
147 amount of labeled proteins was quantified using a Molecular Dynamics PhosphorImager, Storm  
148 860 model and Image Quant (Promega). Total intensity of bands of interest was considered 100  
149 and the amount of each product was calculated based on number of Met residues present in each  
150 subtype Gag polyprotein as percentage of the total amount of labeled substrate in the lane. Rate  
151 of processing was compared across subtypes and experiments as total production of the p24  
152 protein at 60 min.

153

154

155 **Results**

156 **Kinetic analysis of HIV-1 PR alleles from sub-subtype A2, subtypes B and C.**

157 Polymorphisms found within the HIV-1 PR reflect differences between and within subtypes  
158 sub-subtype A2, subtype B, and subtype C. Polymorphic residues found among the HIV-1 PR  
159 subtypes were residue 37 within the elbow region (aa 37-44), residue 69 in the 60s' loop (aa 66-  
160 69), and residues 15 and 16 within the 10s' loop (aa15-18) (Supplementary Figure 1A). No  
161 Polymorphic residue was located within the active site or the dimerization region of the PR  
162 (Supplementary Figure 1A). Efficiency of processing by each PR was assayed using a substrate  
163 that mimics the conserved CA/p2 cleavage site of the Gag polyproteins [33] (Supplementary  
164 Figure 1B). Subtype B PR displayed the highest  $k_{cat}$  values, subtype A2 PR had the highest  $K_m$ ,  
165 while subtype C PR displayed the lowest values for  $k_{cat}$  or  $K_m$  (Table 1). Overall, the catalytic  
166 efficiency ( $k_{cat}/K_m$ ) of subtype A2 or subtype C PR was about 74% or 62%, respectively, of the  
167 activity of subtype B PR (Table 1).

168

169 **HIV-1 Gag polyprotein processing is independent of PR subtype.**

170 The cleavage sites for capsid (CA) and p2 [CA/p2], and nucleocapsid (NC) and p1 [NC/p1]  
171 were conserved among the three subtypes, while the cleavage site for p2 and NC [p2/NC] was  
172 polymorphic in each subtype. Two cleavage sites were identical in B and C Gag subtypes, but  
173 different from A2 Gag, and these were the cleavage sites for matrix/capsid [MA/CA] and for  
174 p1/p6Gag (Supplementary Figure 1B). Particularly, the polymorphic residue in the MA/CA  
175 cleavage site was found at the first residue of the site: a valine residue in B and C Gag subtypes  
176 (aa V128) and a serine residue in A2 Gag (S124) (Supplementary Figure 1B).

177 To assess the contribution of polymorphisms found in Gag polyproteins to Gag  
178 processing, we performed an intra-subtype Gag processing of sub-subtype A2, subtypes B and  
179 C Gag polyproteins by their corresponding PR subtype, taking in account the accumulation of p24



180 as indicator of processing rate (Figure 1). Subtype B p55 was processed with an approximate  
181 half-life time ( $T_{1/2}$ ) of 1 min (Figure 1, Supplementary Figure 2A-C). Approximately 50%  
182 production of p41 was reached at 2 min and peak production of p41 by 15 min. Accumulation of  
183 Subtype B p24 reached approximately 25% by 60 min. Subtypes C p55 was processed slower  
184 ( $T_{1/2}$  of 4 min) as compared to subtype B, and 50% production of p41 was reached at 5 min, and  
185 peak production of p41 by 15 min. However, as respect to subtype B, production of subtype C  
186 p24 was faster than subtype B, with approximately 60% p24 accumulated by 60 min. Sub-subtype  
187 A2 p55 decline ( $T_{1/2}$  of 4 min), and 50% p41 production (4 min) and peak (15 min) were similar to  
188 subtype C. However, sub-subtype A2 final production of p24 was slower as compared to subtypes  
189 B and C, with less than 20% accumulation by 60 min (Figure 1, Supplementary Figure 2A-C).

190 Comparing the inter-subtype processing of subtype B Gag by either sub-subtype A2 or  
191 subtype C PRs, the decline of p55 was slower with  $T_{1/2}$  of 3 or 4 min, respectively. The production  
192 of p41 was slower as well, with 50% production reached around 5 min with both PRs. However,  
193 overall production of subtype B p24 was increased, with 60% production by sub-subtype C PR  
194 and over 80% by subtype A2 PR at 60 min. Subtype C Gag showed faster kinetics when  
195 processed by subtype A2 or subtype B PRs, with  $T_{1/2}$  p55 decline of 1 min. Peak subtype C p41  
196 production by subtype B PR was of 1 min, and of 5 min when processed by sub-subtype A2 PR,  
197 as by subtype C PR. Production of p24 by sub-subtype A2 PR was increased by 10% at 60 min  
198 as compared to subtype C PR processing amount, whereas decreased by 20% when processed  
199 by subtype B PR. The increased p41 production over the course of the experiment, and especially  
200 as shown for sub-subtype A2 p41 production by subtype C PR, indicates that the PRs were active  
201 during 60 min.

202 Rate of sub-subtype A2 p55 processing was slower when processed by subtype C PR  
203 ( $T_{1/2}$  of 8 min), and faster when processed by subtype B PR ( $T_{1/2}$  of 2 min) (Figure 1,  
204 Supplementary Figure 2A-C). Rate of production of sub-subtype A2 p41 was increased by  
205 subtype B PR processing, but not by subtype C PR. However, sub-subtype A2 Gag processing

206 by subtypes B or C PRs decreased the accumulation of sub-subtype A2 p24 at 60 min to 2%.  
207 Overall, the amount of p24/25 sub-subtype A2 Gag processing resulted from processing by  
208 subtype A2 PR (intra-subtype) was 2- to 5-fold less as compared to the amounts generated by  
209 respective intra-subtype processing of subtypes B or C Gags. The rate of inter-subtype sub-  
210 subtype A2 Gag processing was 15- to 20-fold lower if compared to the inter-subtype processing  
211 of subtypes B or C. Moreover, the amount of p24/25 produced by the intra-processing of sub-  
212 subtype A2 Gag was 4-fold less than the amount resulted from inter-subtype of subtype B Gag  
213 by sub-subtype A2 PR. This latter observation suggests that sub-subtype A2 PR activity was  
214 reduced in presence of sub-subtype A2 Gag polyprotein but efficient in presence of other Gag  
215 subtypes (Figure 1, Supplementary Figure 2A-C).

216 Together these results indicate that sub-subtype A2 Gag p55 can be processed by  
217 subtype B PR even more rapidly than by A PR, perhaps reflecting the modest polymorphisms in  
218 p2/NC cleavage site; and sub-subtype A2 Gag p41 accumulates even more rapidly when  
219 processed by B PR than by A PR (Supplementary Figure S1A). Finally, independent of which  
220 subtype PR. sub-subtype A2 p24/p25 was not accumulated at the same rate as for subtypes B or  
221 C products, and a possible explanation is the single amino acid polymorphism at the MA/CA  
222 cleavage site (Supplementary Figure S1A)..

223 **The V124S polymorphism at the MA/CA cleavage site of sub-subtype A2 Gag polyprotein**  
224 **is influencing Gag processing rate.**

225 The MA/CA cleavage site harbored the V124S polymorphism on residue S124 of sub-  
226 subtype A2 Gag polyprotein, corresponding to residues V128 or V125 of subtype B or C,  
227 respectively (Figure 2A, Supplementary Figure 2D). To assess the role for V128/S124  
228 polymorphism in determining p55 processing rate, the subtype B or sub-subtype A2 MA/CA  
229 cleavage sites were mutated into sub-subtype A2 p55 (A2gagS124V and A2gag\_QV) or subtype  
230 B Gag polyprotein (BgagV128L, BgagV128S and Bgag\_ΔQV) respectively, and all mutant  
231 proteins were processed by subtype B PR (Figure 2B, Supplementary Figure 2E). The rate of

232 processing of the A2gagS124V and Agag\_QV mutant proteins by subtype B PR increased by  
233 two-fold, with twice as much p24/25 production when compared to wild type, but seven fold less  
234 compared to subtype B Gag. On the other hand, the processing of the subtype B p55 mutants  
235 decreased significantly: p24/25 production by processing the BgagV128L mutant protein was  
236 double as compared to wild-type, while by processing the BgagV128S mutant was three times  
237 less when compared to wild-type subtype B Gag, and twice as much as for sub-subtype A2 Gag.  
238 The amount of p24/25 generated processing Bgag\_ΔQV and BgagV128S mutant proteins was  
239 similar. The constant increased p41 production indicates that the PRs were active at least for 90  
240 min.

241 Taken together, these results indicated that the V124S polymorphism at the MA/CA  
242 cleavage site affected the processing rate of sub-subtype A2 Gag polyprotein, and suggested that  
243 other polymorphisms within Gag may also contribute to regulate processing. Overall these results  
244 confirmed that the MA/CA cleavage site plays a role in regulating HIV-1 Gag polyprotein  
245 processing rate.

246

247 **Discussion**

248           The global distribution of HIV-1 is a dynamic process determined by viral genetic diversity  
249 due to high mutation and recombination rate. Viral fitness of dominant subtypes and regional  
250 shifting in distribution of non-B subtypes and recombinants is occurring, especially in regions of  
251 Sub-Saharan Africa and Southeast Asia. Sub-subtype A2, that found its niche in West Africa in  
252 2000 and is currently infecting 0.4% of the West African population, has been almost entirely  
253 replaced by the more infectious sub-subtype A [21, 36]. The geographical constriction of A2 to  
254 local epidemics and the predominance of sub-subtype A1 over A2, as well as other subtypes,  
255 may be due to transmission bottlenecks reflecting viral genetic effects as well as social/behavioral  
256 or environmental limitations.

257           The goal of our study was to relate the Gag processing events *ex vivo* with viral fitness in  
258 human populations, rather than to viral replicative analysis *in vivo*. Sub-subtype A2 harbors a  
259 serine residue in position 124 which we described as a limiting factor of Gag processing; the sub-  
260 subtype A1 harbors instead a valine residue, as subtypes B and C [14]. Mutations at the MA/CA  
261 cleavage site are reported to reduce viral infectivity explaining the high degree of conservation of  
262 the MA/CA cleavage site residues within group M subtypes and recombinants [22, 37]. While a  
263 98% of conservation is found among subtype A, A1, B and C, sub-subtype A2 showed only 89%  
264 [22].

265           CRFs are emerging in the HIV-1 epidemic representing the new direction of HIV-1  
266 evolution. Among the diversity of CRFs worldwide, in Africa only two CRFs show exchange  
267 between the subtype A gag polyprotein and subtype C PR and vice versa as result of the  
268 recombination events [38]. A third CRF was found in Canada harboring subtype C gag polyprotein  
269 and subtype A PR [39].

270           By combining Gag polyproteins and PRs from different subtypes, our study examines the  
271 natural subtype-interplay processing event found during infection with CRFs that carry PR and  
272 Gag polyproteins from different HIV-1 subtypes. Our finding showed that non-A2 subtype PR

273 processes the Gag polyproteins of subtype A2 with a higher rate as compared with its own PR.  
274 CRFs that harbor the *gag* region of subtype A present a tendency not to conserve the  
275 corresponding *pol* region and vice versa, which harbors the PR of subtype A but the *gag*  
276 polyprotein of subtype K [22]. Given our results, it is not surprising that two recombinant forms of  
277 sub-subtype A2 with subtype D found in Kenya, CRF16\_A2D and CRF21\_A2D, are preserving  
278 the MA/CA cleavage of sub-subtype A2 (1186 nt) and encoding the subtype D PR (2253-2550 nt)  
279 (<http://www.hiv.lanl.gov/> 2017) [38, 40]. The CRFs of sub-subtype A2 and subtype D,  
280 CRF16\_A2D and CRF21\_A2D, prove recombination as alternative mechanism of spread within  
281 the population for strains such as sub-subtype A2 which otherwise would be relatively rare in the  
282 pandemic. Moreover, the incidence of the CRFs of sub-subtype A2 with subtype D (2-9%) among  
283 HIV-1 infections in Kenya, lower as compared to subtype D (28%) and higher to sub-subtype A2  
284 (2.7%) [41], is in agreement with our hypothesis that sub-subtype A2 MA/CA cleavage may  
285 reduce viral fitness. Together with our findings, these data suggest that compensation of subtype  
286 D PR for the sub-subtype A2 MA/CA cleavage site is insufficient to improve the processing rate.  
287 Monitoring of sub-subtype A2, A2-containing recombinants, as well as other rare subtypes  
288 circulating in limited geographic area, together with consideration of the socio-economic factors  
289 that influence transmission of HIV-1, may provide fundamental information for further  
290 development and evaluation of candidate niche vaccines to eradicate even minor variants.

291 In conclusion, our findings suggest that the V124S polymorphism present in the MA/CA  
292 cleavage of sub-subtype A2, together with the amino acidic context surrounding the cleavage and  
293 at non-cleavage sites, is a novel key factor influencing sub-subtype A2 fitness and a potential  
294 mechanisms governing PR interactions with Gag, which substantially influence the frequencies  
295 of HIV-1 subtypes, sub-subtypes and CRFs worldwide.

296 **Conclusions**

- 297 • The processing rate of Gag polyproteins of sub-subtype A2, as well as of subtypes B and C,  
298 is independent of the intrinsic activity of the PR or subtype.
- 299 • The S124V polymorphism present at the matrix-capsid cleavage site of sub-subtype A2  
300 influence the direct processing rate of the Gag polyprotein together with non-cleavage sites  
301 polymorphisms.
- 302 • The less prevalent and less infectious HIV-1 sub-subtype A2 harbors a matrix-capsid  
303 cleavage site polymorphism that is a limiting factor for gag processing, while the more  
304 prevalent and infectious HIV-1 sub-subtype A1 present the same matrix-capsid cleavage site  
305 as subtypes B and C.
- 306 • The analysis on sub-subtype A2, and subtypes B and C, that we performed suggested that  
307 the viral fitness found *in vivo* among from different subtypes in the “wild” among HIV-1 infected  
308 individuals may be related to a lower Gag processing rate.
- 309
- 310

311 **Table and Figure Legends**

312 **Table 1. Kinetic parameters of HIV-1 PRs of subtypes B, C and sub-subtype A2.**

| <b>Subtype</b> | <b><math>K_m</math> (<math>\mu\text{M}</math>)</b> | <b><math>k_{\text{cat}}</math> (<math>\text{s}^{-1}</math>)</b> | <b><math>k_{\text{cat}}/K_m</math> (<math>\text{s}^{-1} \mu\text{M}^{-1}</math>)</b> |
|----------------|----------------------------------------------------|-----------------------------------------------------------------|--------------------------------------------------------------------------------------|
| <b>B</b>       | $19.5 \pm 2$                                       | $10 \pm 1$                                                      | $0.51 \pm 0.06$                                                                      |
| <b>C</b>       | $17 \pm 1$                                         | $5.6 \pm 0.2$                                                   | $0.32 \pm 0.02$                                                                      |
| <b>A2</b>      | $22 \pm 2$                                         | $8.4 \pm 0.4$                                                   | $0.38 \pm 0.04$                                                                      |

313 Standard deviations are best-fit values through multiple points done twice.

314

315

316 **Figure 1. *In trans* processing of HIV-1 subtype B, C and sub-subtype A2 Gag polyproteins**  
 317 **by same and different PR subtype.** Graphs show the percentage of substrate and products  
 318 derived from the *in trans* processing of Gag polyprotein subtype B, subtype C and sub-subtype  
 319 A2 upon addition of intra-subtype and inter-subtype PR combinations. Data are based on at least  
 320 3 experiments and expressed as mean  $\pm$  SEM. Representative gel experiment is reported in  
 321 Supplementary Figure 2A-C.  
 322  
 323  
 324

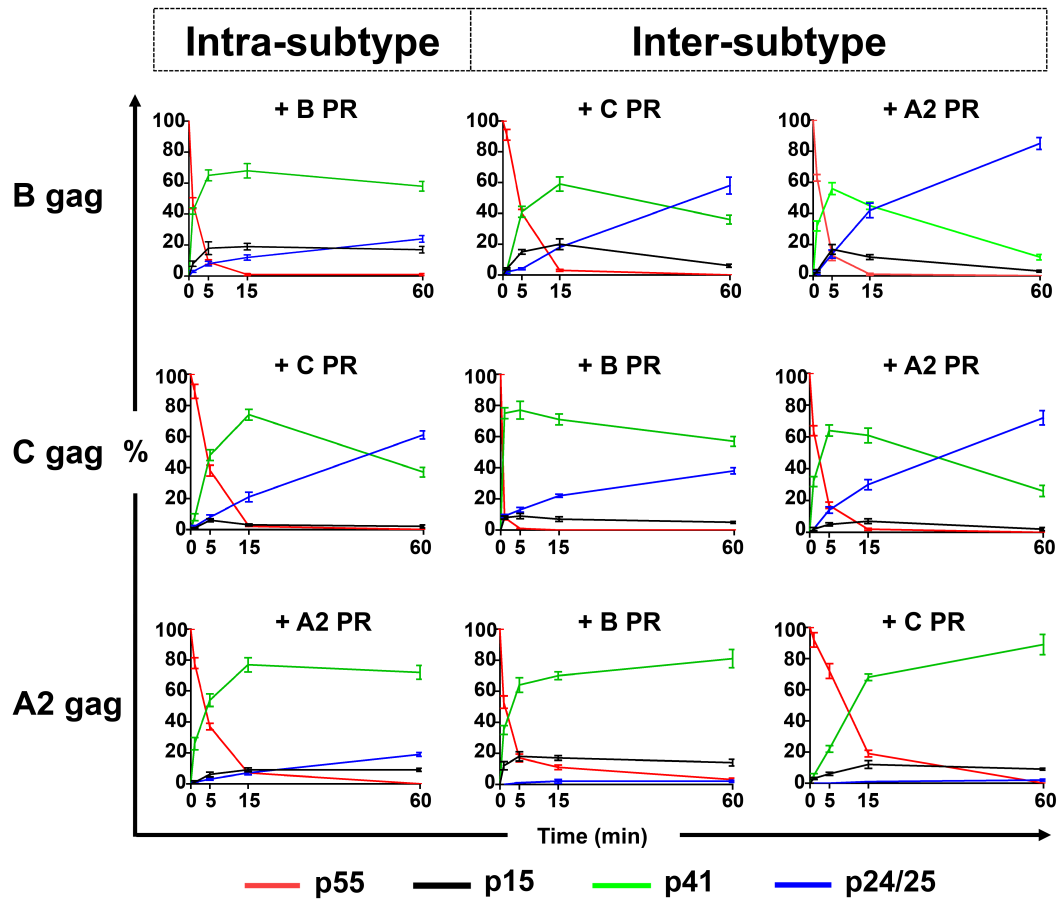

325  
 326  
 327  
 328  
 329  
 330



331 **Figure 2. *In trans* processing of HIV-1 sub-subtype A2 and subtype B gag polyprotein**  
 332 **mutants by subtype B PR.** (A) Schematic representation of the p55 gag precursor with  
 333 cleavage site for matrix (MA) and capsid (CA) [MA/CA], cleavage site for production of p24/25.  
 334 The MA/CA cleavage site sequence for subtype B and sub-subtype A2 are shown in the box,  
 335 conserved residues are reported in black and polymorphic residues in red. (B) Graphs show the  
 336 percentage of substrate and products derived from the processing of Agag, AgagS124V,  
 337 AgagQV polyproteins, and BgagV128L, BgagV128S, BgagΔQV polyproteins upon addition *in*  
 338 *trans* of subtype B PR is shown in time. Data are based on at least 3 experiments and  
 339 expressed as mean ± SEM.  
 340

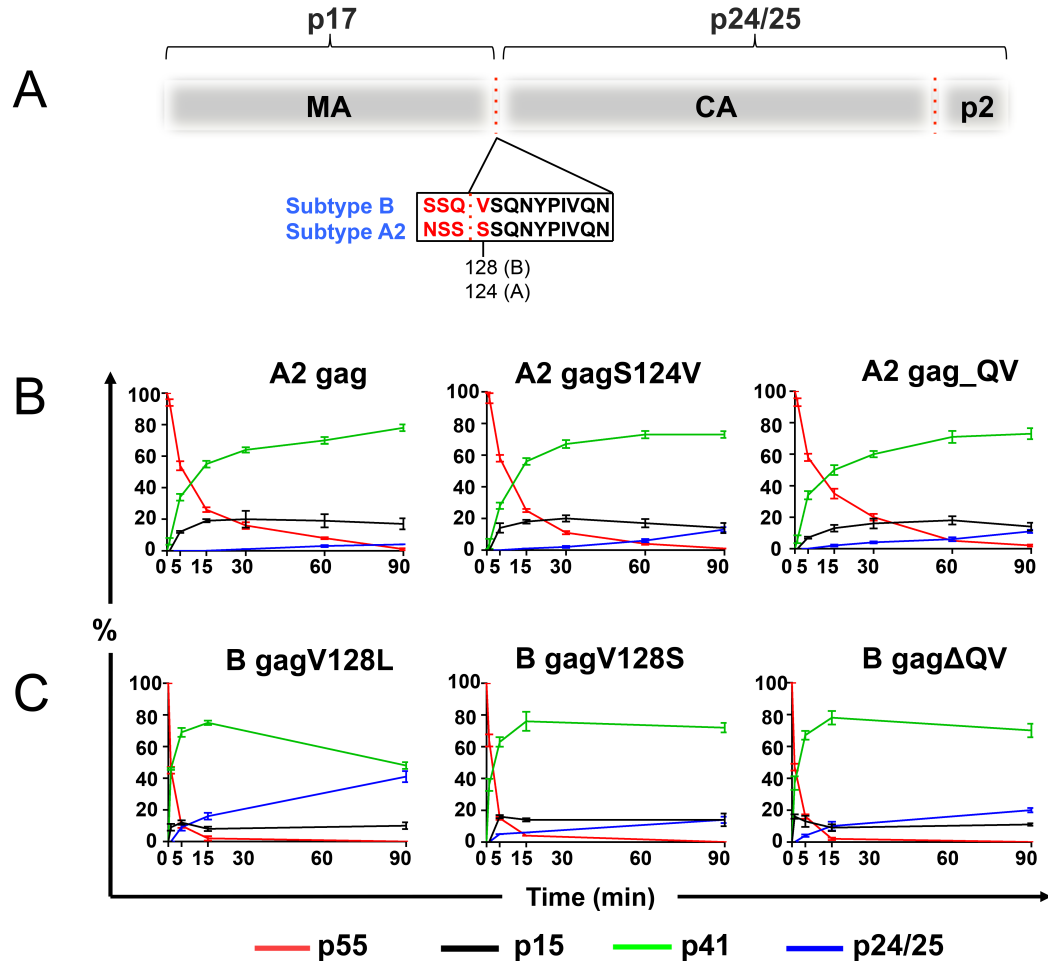

341

342

343

344

345

346 **Supplementary Material**

347 **Table S1. Geographical prevalence and distribution of HIV-1 sub-subtypes A1 and A2.**

| Geographic areas | Individuals infected with HIV-1 sub-subtype (%) |     |
|------------------|-------------------------------------------------|-----|
|                  | A1                                              | A2  |
| Horn of Africa   | 0.0                                             | 0.0 |
| West Africa      | 18.8                                            | 0.4 |
| South Africa     | 0.4                                             | 0.0 |
| East Africa      | 48.1                                            | 0.0 |
| North America    | 1.0                                             | 0.0 |
| South America    | 0.1                                             | 0.0 |
| North Asia       | 99.1                                            | 0.0 |
| Central Asia     | 0.0                                             | 0.0 |
| South Asia       | 0.0                                             | 0.0 |
| Europe           | 4.7                                             | 0.0 |

348 <sup>a</sup>Information retrieved from [21]

349  
 350 **Figure S1. Schematic representation and sequence alignment of subtype B, C and sub-**  
 351 **subtype A2 HIV-1 PR and Gag polyproteins with polymorphisms highlighted. (A)** Sequence  
 352 alignment for subtype B, C and sub-subtype A2 PRs is reported compared to subtype B sequence  
 353 as reference. Same amino acid residues are shown with -, polymorphisms in red, and the catalytic  
 354 residue in green. (B) Schematic representation of subtype B, C and sub-subtype A2 Gag  
 355 polyproteins with cleavage sites for matrix (MA), capsid (CA), p2, nucleocapsid (NC), p1 and  
 356 p6<sup>GAG</sup> proteins sequences reported in boxes. Numbers report the order of Gag processing.  
 357 Conserved residues are shown in black, polymorphic residues in red.

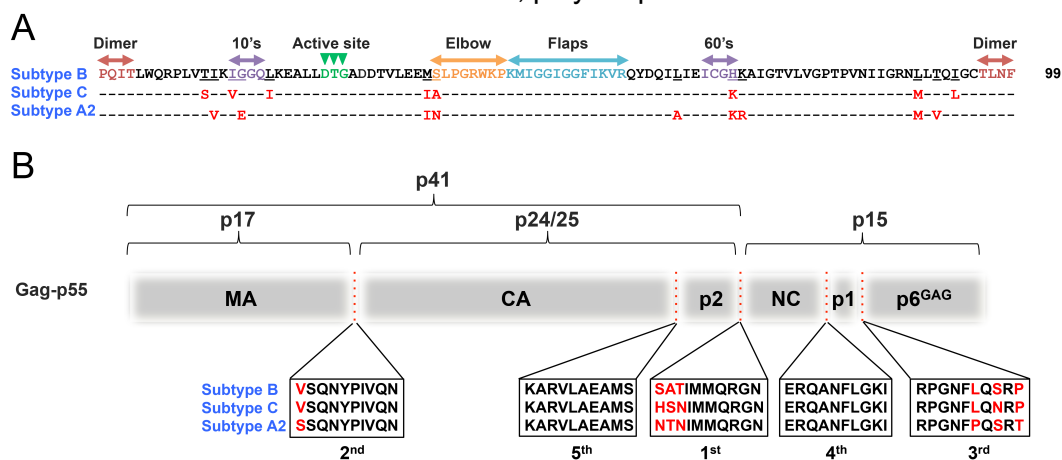

358  
 359  
 360

361 **Figure S2. Gels for *in trans* processing of HIV-1 subtype B, C and sub-subtype A2 Gag**  
362 **polyproteins by same and different PR subtype, and for *in trans* processing of HIV-1**  
363 **subtype B and sub-subtype A2 gag polyprotein mutants by subtype B PR.** (A) Processing  
364 of Gag polyprotein subtype B, (B) subtype C and (C) sub-subtype A2 upon *in trans* addition of  
365 different subtype PR. (D) processing of gag polyprotein sub-subtype A2, and of AgagS124V,  
366 AgagQV, (E) BgagV128L, BgagV128S, and Bgag $\Delta$ QV mutant gag polyproteins upon addition *in*  
367 *trans* of subtype B PR. Cocktail of gag polyprotein and subtype PR is shown above gel panels,  
368 and percentage of substrate and products is reported below. Time is indicated in minutes in wells  
369 above corresponding lane.

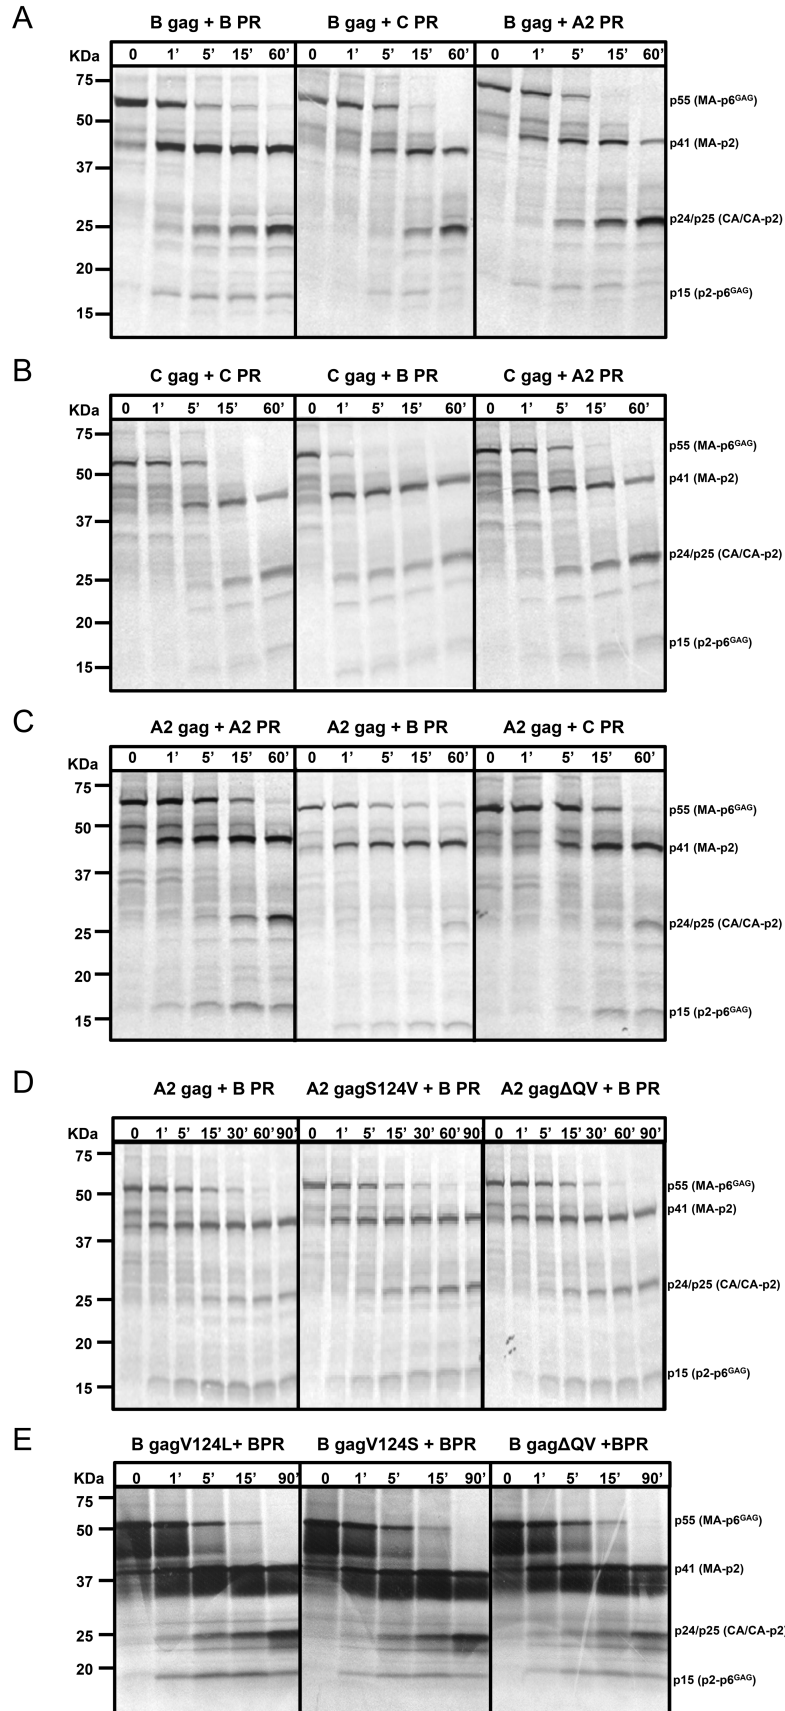

## 371 References

- 372 1. Kalish, M.L., et al., *Recombinant viruses and early global HIV-1 epidemic*. Emerg Infect  
373 Dis, 2004. **10**(7): p. 1227-34.
- 374 2. Hemelaar, J., *Implications of HIV diversity for the HIV-1 pandemic*. The Journal of  
375 infection, 2013. **66**(5): p. 391-400.
- 376 3. Korber, B., et al., *Evolutionary and immunological implications of contemporary HIV-1*  
377 *variation*. Br Med Bull, 2001. **58**: p. 19-42.
- 378 4. Ward, M.J., et al., *Estimating the rate of intersubtype recombination in early HIV-1 group*  
379 *M strains*. Journal of virology, 2013. **87**(4): p. 1967-73.
- 380 5. Vidal, N., et al., *Unprecedented degree of human immunodeficiency virus type 1 (HIV-1)*  
381 *group M genetic diversity in the Democratic Republic of Congo suggests that the HIV-1*  
382 *pandemic originated in Central Africa*. J Virol, 2000. **74**(22): p. 10498-507.
- 383 6. Lau, K.A. and J.J. Wong, *Current Trends of HIV Recombination Worldwide*. Infect Dis  
384 Rep, 2013. **5**(Suppl 1): p. e4.
- 385 7. Hemelaar, J., et al., *Global trends in molecular epidemiology of HIV-1 during 2000-2007*.  
386 AIDS, 2011. **25**(5): p. 679-89.
- 387 8. Li, Y., et al., *Explosive HIV-1 subtype B' epidemics in Asia driven by geographic and risk*  
388 *group founder events*. Virology, 2010. **402**(2): p. 223-7.
- 389 9. Ferdinandy, B., et al., *HIV competition dynamics over sexual networks: first comer*  
390 *advantage conserves founder effects*. PLoS Comput Biol, 2015. **11**(2): p. e1004093.
- 391 10. Santoro, M.M. and C.F. Perno, *HIV-1 Genetic Variability and Clinical Implications*. ISRN  
392 Microbiol, 2013. **2013**: p. 481314.
- 393 11. Shao, Y. and C. Williamson, *The HIV-1 epidemic: low- to middle-income countries*. Cold  
394 Spring Harb Perspect Med, 2012. **2**(3): p. a007187.
- 395 12. Kozisek, M., et al., *Mutations in HIV-1 gag and pol compensate for the loss of viral fitness*  
396 *caused by a highly mutated protease*. Antimicrob Agents Chemother, 2012. **56**(8): p. 4320-  
397 30.
- 398 13. Ho, S.K., et al., *Drug-associated changes in amino acid residues in Gag p2, p7(NC), and*  
399 *p6(Gag)/p6(Pol) in human immunodeficiency virus type 1 (HIV-1) display a dominant*  
400 *effect on replicative fitness and drug response*. Virology, 2008. **378**(2): p. 272-81.
- 401 14. Gao, F., et al., *Evidence of two distinct subsubtypes within the HIV-1 subtype A radiation*.  
402 AIDS Res Hum Retroviruses, 2001. **17**(8): p. 675-88.
- 403 15. Meloni, S.T., et al., *Distinct human immunodeficiency virus type 1 subtype A virus*  
404 *circulating in West Africa: sub-subtype A3*. J Virol, 2004. **78**(22): p. 12438-45.
- 405 16. Vidal, N., et al., *Identification and molecular characterization of subsubtype A4 in central*  
406 *Africa*. AIDS Res Hum Retroviruses, 2006. **22**(2): p. 182-7.
- 407 17. Vidal, N., et al., *Genetic characterization of eight full-length HIV type 1 genomes from the*  
408 *Democratic Republic of Congo (DRC) reveal a new subsubtype, A5, in the A radiation that*  
409 *predominates in the recombinant structure of CRF26\_A5U*. AIDS Res Hum Retroviruses,  
410 2009. **25**(8): p. 823-32.
- 411 18. Fonjungo, P.N., et al., *Presence of diverse human immunodeficiency virus type 1 viral*  
412 *variants in Cameroon*. AIDS Res Hum Retroviruses, 2000. **16**(13): p. 1319-24.
- 413 19. Kostrikis, L.G., et al., *Genetic analysis of human immunodeficiency virus type 1 strains*  
414 *from patients in Cyprus: identification of a new subtype designated subtype I*. J Virol, 1995.  
415 **69**(10): p. 6122-30.

- 416 20. Janssens, W., et al., *Genetic variability of HIV type 1 in Kenya*. AIDS Res Hum  
417 Retroviruses, 1994. **10**(11): p. 1577-9.
- 418 21. Arien, K.K., G. Vanham, and E.J. Arts, *Is HIV-1 evolving to a less virulent form in*  
419 *humans?* Nat Rev Microbiol, 2007. **5**(2): p. 141-51.
- 420 22. Torrecilla, E., T. Llacer Delicado, and A. Holguin, *New findings in cleavage sites*  
421 *variability across groups, subtypes and recombinants of human immunodeficiency virus*  
422 *type 1*. PLoS One, 2014. **9**(2): p. e88099.
- 423 23. Luo, M., et al., *Immunogenicity of sequences around HIV-1 protease cleavage sites:*  
424 *potential targets and population coverage analysis for a HIV vaccine targeting protease*  
425 *cleavage sites*. Vaccine, 2013. **31**(29): p. 3000-8.
- 426 24. Liegeois, F., et al., *Short communication: high natural polymorphism in the gag gene*  
427 *cleavage sites of non-B HIV type 1 isolates from Gabon*. AIDS Res Hum Retroviruses,  
428 2013. **29**(8): p. 1179-82.
- 429 25. de Oliveira, T., et al., *Variability at human immunodeficiency virus type 1 subtype C*  
430 *protease cleavage sites: an indication of viral fitness?* J Virol, 2003. **77**(17): p. 9422-30.
- 431 26. Kaleebu, P., et al., *Effect of human immunodeficiency virus (HIV) type 1 envelope subtypes*  
432 *A and D on disease progression in a large cohort of HIV-1-positive persons in Uganda*. J  
433 Infect Dis, 2002. **185**(9): p. 1244-50.
- 434 27. Spira, S., et al., *Impact of clade diversity on HIV-1 virulence, antiretroviral drug sensitivity*  
435 *and drug resistance*. J Antimicrob Chemother, 2003. **51**(2): p. 229-40.
- 436 28. Wargo, A.R. and G. Kurath, *Viral fitness: definitions, measurement, and current insights*.  
437 Curr Opin Virol, 2012. **2**(5): p. 538-45.
- 438 29. Prince, J.L., et al., *Role of transmitted Gag CTL polymorphisms in defining replicative*  
439 *capacity and early HIV-1 pathogenesis*. PLoS Pathog, 2012. **8**(11): p. e1003041.
- 440 30. Brann, T.W., et al., *Functional correlation between a novel amino acid insertion at codon*  
441 *19 in the protease of human immunodeficiency virus type 1 and polymorphism in the p1/p6*  
442 *Gag cleavage site in drug resistance and replication fitness*. Journal of virology, 2006.  
443 **80**(12): p. 6136-45.
- 444 31. Peden, K., M. Emerman, and L. Montagnier, *Changes in growth properties on passage in*  
445 *tissue culture of viruses derived from infectious molecular clones of HIV-1LAI, HIV-1MAL,*  
446 *and HIV-1ELI*. Virology, 1991. **185**(2): p. 661-72.
- 447 32. Rodenburg, C.M., et al., *Near full-length clones and reference sequences for subtype C*  
448 *isolates of HIV type 1 from three different continents*. AIDS Res Hum Retroviruses, 2001.  
449 **17**(2): p. 161-8.
- 450 33. Coman, R.M., et al., *The contribution of naturally occurring polymorphisms in altering the*  
451 *biochemical and structural characteristics of HIV-1 subtype C protease*. Biochemistry,  
452 2008. **47**(2): p. 731-43.
- 453 34. Goodenow, M.M., et al., *Naturally occurring amino acid polymorphisms in human*  
454 *immunodeficiency virus type 1 (HIV-1) Gag p7(NC) and the C-cleavage site impact Gag-*  
455 *Pol processing by HIV-1 protease*. Virology, 2002. **292**(1): p. 137-49.
- 456 35. Bhatt, D. and B.M. Dunn, *Chimeric aspartic proteinases and active site binding*. Bioorg  
457 Chem, 2000. **28**(6): p. 374-93.
- 458 36. Powell, R., et al., *The Evolution of HIV-1 Diversity in Rural Cameroon and its Implications*  
459 *in Vaccine Design and Trials*. Viruses, 2010. **2**(2): p. 639-654.

- 460 37. Kiernan, R.E., A. Ono, and E.O. Freed, *Reversion of a human immunodeficiency virus type*  
461 *1 matrix mutation affecting Gag membrane binding, endogenous reverse transcriptase*  
462 *activity, and virus infectivity.* J Virol, 1999. **73**(6): p. 4728-37.
- 463 38. Dowling, W.E., et al., *Forty-one near full-length HIV-1 sequences from Kenya reveal an*  
464 *epidemic of subtype A and A-containing recombinants.* AIDS, 2002. **16**(13): p. 1809-20.
- 465 39. Ntemgwa, M., et al., *Near full-length genomic analysis of a novel subtype A1/C*  
466 *recombinant HIV type 1 isolate from Canada.* AIDS research and human retroviruses,  
467 2008. **24**(4): p. 655-9.
- 468 40. Visawapoka, U., et al., *Circulating and unique recombinant forms of HIV type 1 containing*  
469 *subsubtype A2.* AIDS Res Hum Retroviruses, 2006. **22**(7): p. 695-702.
- 470 41. Adungo, F., Gicheru, M. , Adungo, N. , Matilu, M. , Lihana, R. and Khamadi, S. , *Diversity*  
471 *of Human Immunodeficiency Virus Type-1 Subtypes in Western Kenya.* . World Journal of  
472 AIDS, 2014. **4**(4): p. 365-372.  
473
